# Supplementary material
Source: publisher figshare collection journal article supplement (https://acs.figshare.com/ndownloader/files/22061166)
Supplement: Supplementary file 1 [file 22061166]

# SUPPORTING INFORMATION

## Nucleolin discriminates drastically between long-loop and short-loop Quadruplexes.

Abhijit Saha,<sup>1,2</sup> Patricia Duchambon,<sup>1,2</sup> Vanessa Masson,<sup>3</sup> Damarys Loew,<sup>3</sup> Sophie Bombard<sup>1,2</sup>, Marie-Paule Teulade-Fichou<sup>1,2\*</sup>

<sup>1</sup>CNRS UMR9187, INSERM U1196, Institut Curie, PSL Research University, 91405 Orsay, France

<sup>2</sup>CNRS UMR9187, INSERM U1196, Université Paris Sud, Université Paris Saclay, 91405 Orsay, France.

<sup>3</sup>Institut Curie, PSL Research University, Centre de Recherche, Laboratoire de Spectrométrie de Masse Protéomique, 26 rue d'Ulm, Paris 75248 Cedex 05, France

**\*Corresponding Author:** Dr. Marie-Paule Teulade-Fichou, email: [mp.teulade-fichou@curie.fr](mailto:mp.teulade-fichou@curie.fr)

**Figure S1.** SDS PAGE (4-20%) for purity check of the recombinant NCL used in this study

**Figure S2.** EMSA for monitoring binding of NCL to the G4Mut sequence

**Figure S3:** CD and FRET melting of G4 CEB25-L191 in presence of NCL.

**Figure S4.** EMSA for monitoring NCL binding to the BCL2mid sequence

**Figure S5:** CD spectra of WT-CEB25-L191 and of its analogue sequence modified in position 16 by BrU

**Figure S6** SDS PAGE analysis of the control experiment of photo-crosslinking reaction from Fig 3

**Figure S7.** Schematic representation of the LC-MS/MS analysis workflow for the identification of NCL peptides interacting with G4 DNA

**Figure S8.** Displacement of NCL from CEB25-L191 followed by EMSA gel (10%) in the presence of various G4 ligands

**Figure S9:** Stabilisation of G4-CEB25-191 by ligands measured by FRET-melting

**Table S1:** T<sub>m</sub> of sequences used in this study.

**Table S2:** List of peptides identified following the workflow of Fig S5 S7 with corresponding UV+/UV- ratios of extracted areas and p values.

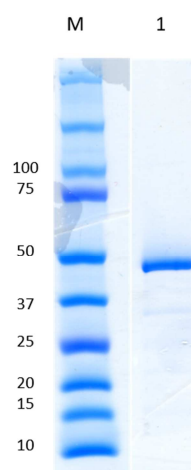

**Figure S1.** SDS PAGE (4-20%) for purity check of the recombinant NCL used in this study (size 46.1 KDa). Lane M: marker, lane 1: NCL alone.

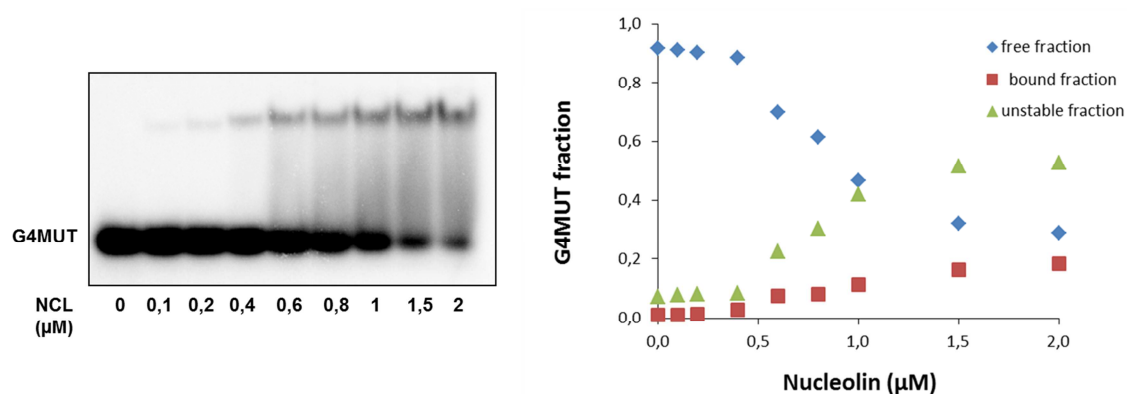

**Figure S2.** Left) EMSA for monitoring binding of NCL to the G4Mut sequence. NCL concentration ranged from 100 to 2000 nM, corresponding to 0.1, 0.2, 0.5, 0.7, 0.9, 1.1, 1.7, 2.3  $\mu\text{g}$  of recombinant protein in a 20  $\mu\text{L}$  reaction. Right) Quantification of bands: Unstable fraction corresponds to the smearing band.

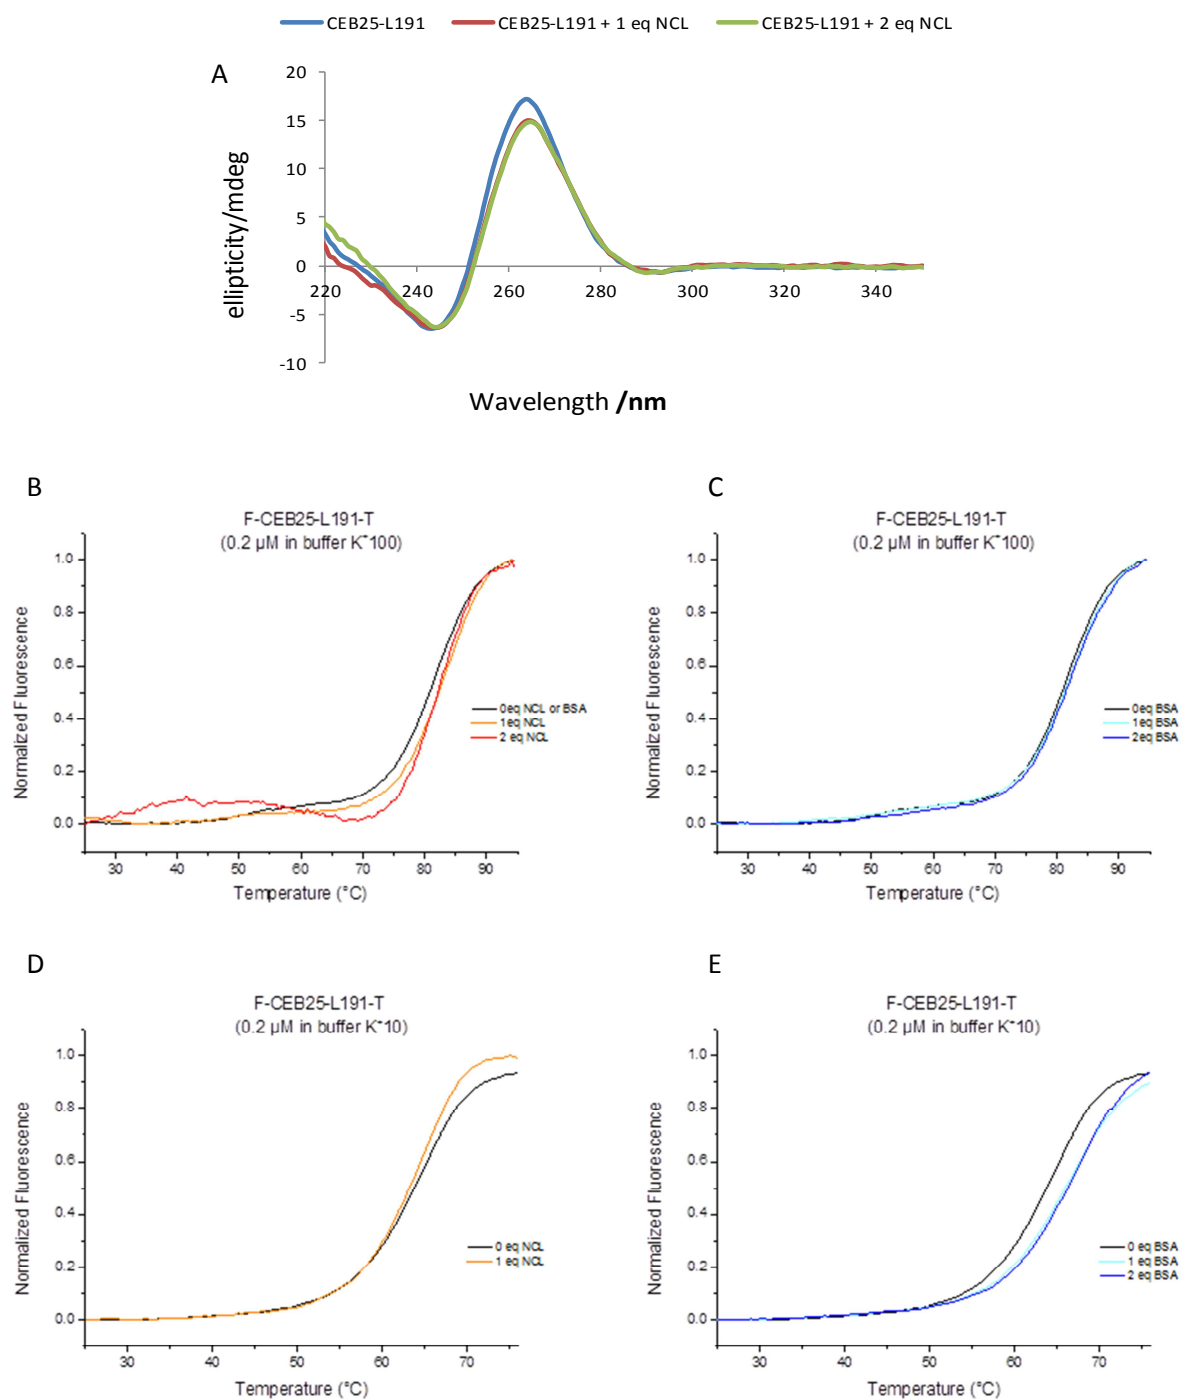

**F**

| T <sub>m</sub> (°C) | K100 | K10  |
|---------------------|------|------|
| 0eq                 | 81.1 | 64.2 |
| 1eqNCL              | 81.5 | 63.4 |
| 2eqNCL              | 82.6 | ND   |
| 1eqBSA              | 81.7 | 65.6 |
| 2eqBSA              | 81.4 | 66.0 |

**Figure S3 :** A) CD spectra of CEB25-L191 (3 $\mu$ M) alone (blue line, min 245 and max 264 nm indicate parallel topology see also Fig S5) and after incubation with NCL (1 and 2 eq red and green lines) in buffer containing 10mM Tris (pH7.5) 100mM KCl and 1mM EDTA in 1% glycerol. Spectra have been subtracted as appropriate for NCL and buffer signals. B, C, D and E) FRET melting curves of Fam/Tamra labelled CEB25 L191 (F-CEB25-L191-T) (0.2  $\mu$ M) alone and in incubation with (1 and 2 eq) NCL or BSA in buffer containing B and C) 10mM Tris (pH7.5) 100mM KCl and 1mM EDTA in 1% glycerol (K100) or D and E) 10mM Tris (pH7.5) 10mM KCl and 1mM EDTA in 1% glycerol (K10). F) T<sub>m</sub> values. ND: not determined due to low fluorescence signal.

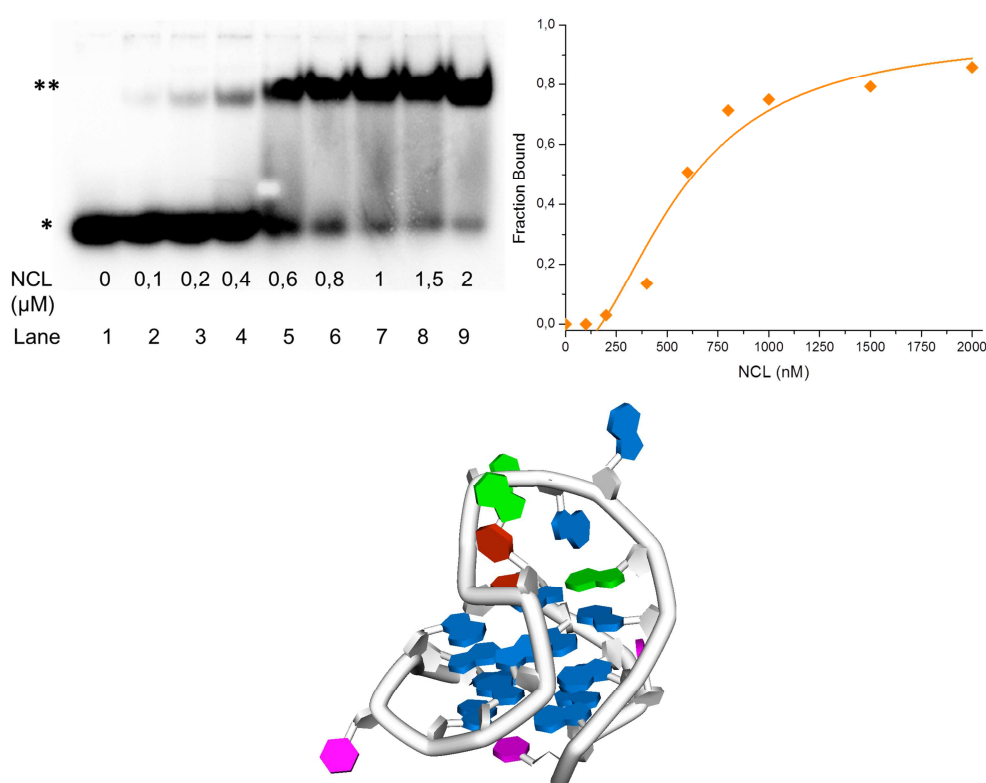

**Figure S4.** EMSA for monitoring NCL binding to the BCL2mid sequence (NMR structure shown below, PDB 2F8U, G blue, A green, T orange, C violet). NCL concentration ranged from 100 to 2000 nM, corresponding to 0.1, 0.2, 0.5, 0.7, 0.9, 1.1, 1.7, 2.3  $\mu$ g of recombinant protein in a 20  $\mu$ L reaction. 1:1 fitting of the curve gives  $K_D$ = 558 nM.

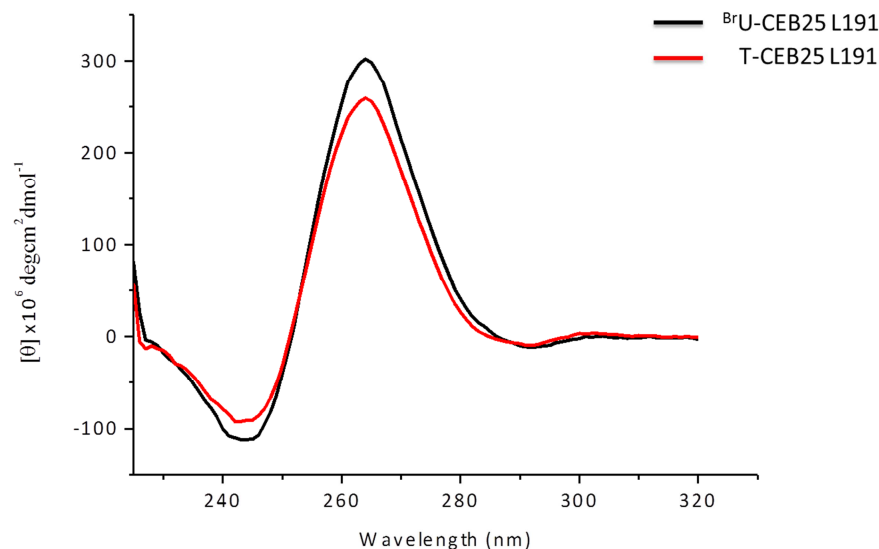

**Figure S5:** CD spectra of WT-CEB25-L191 and of its analogue sequence modified in position 16 by BrU (oligonucleotide 16BrU, Fig 4C). Maxima at 264 nm and minima at 245 nm are typical of parallel topology. For other sequences see Saha, A., Bombard, S., Granzhan, A., Teulade-Fichou, M. P. (2018) Probing of G-Quadruplex Structures via Ligand-Sensitized Photochemical Reactions in BrU-Substituted DNA. *Scientific Reports*. 8, 1-14.

AAGGGTGGGTGTAAGTGTGGGTGGGT L191-1

AAGGGTGGGAGTGTGGGTGGGT L151-1

AAGGGTGGGTGTGGGTGGGT L131-1

AAGGGTGGGTGGGTGGGT L121-1

AAGGGTGGGTGGGTGGGT L111-1

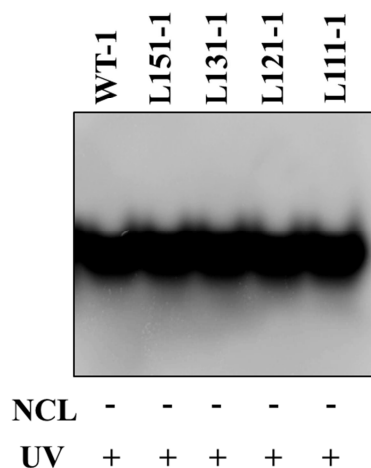

**Figure S6** SDS PAGE analysis of the control experiment of photo-crosslinking reaction from Fig 3 using single BrU substituted CEB25 sequence variants named CEB25-L1X1-1, X indicates central loop length X= 9,5,3,2,1, -1 stands for 1 BrU residue. [DNA] = 20 nM, [NCL] = 1  $\mu$ M, UV irradiation time 10 min, Exc: 300 nm

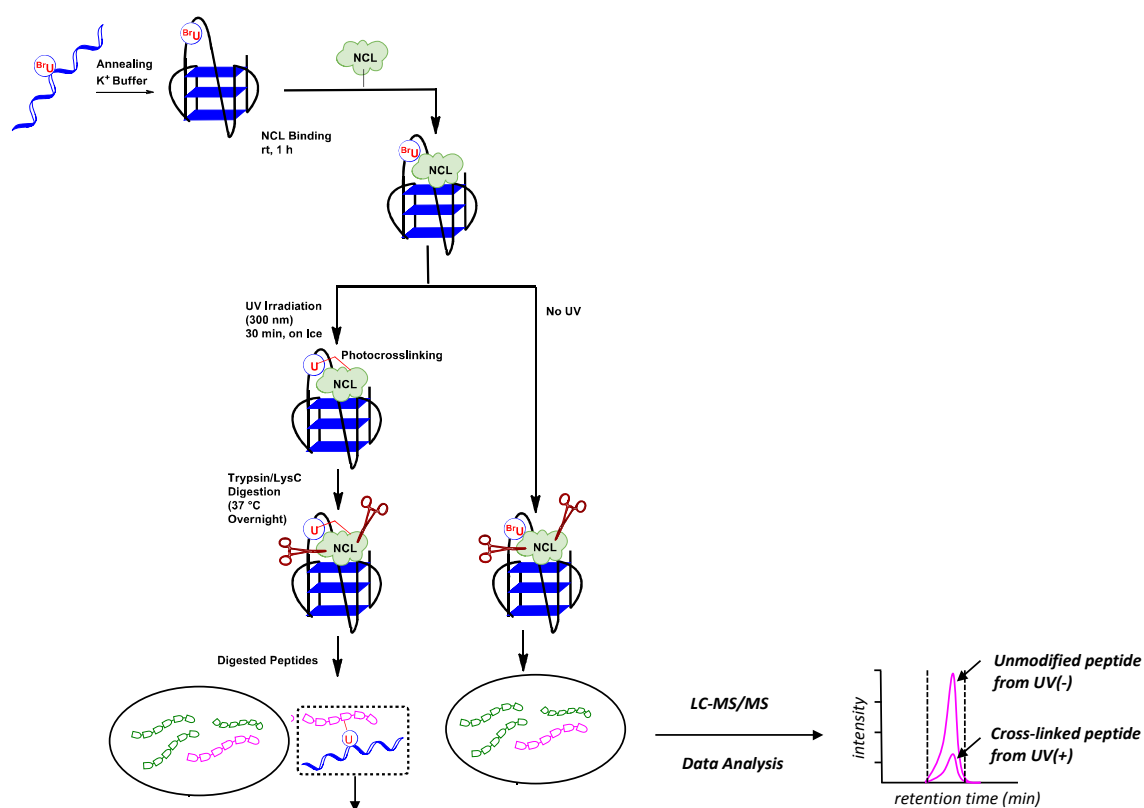

**Figure S7.** Schematic representation of the LC-MS/MS analysis workflow for the identification of NCL peptides interacting with G4 DNA. The UV-irradiated sample, (i.e. covalent binding of NCL with DNA) and non UV-irradiated sample (i.e. non-covalent complex of NCL with DNA) were enzymatically digested with trypsin/lysC and the resulting peptides were characterized by LC-MS/MS. Identification of putatively bound peptides will be indicated by the ratio of peak area of each peptide in the UV+ and UV- samples.

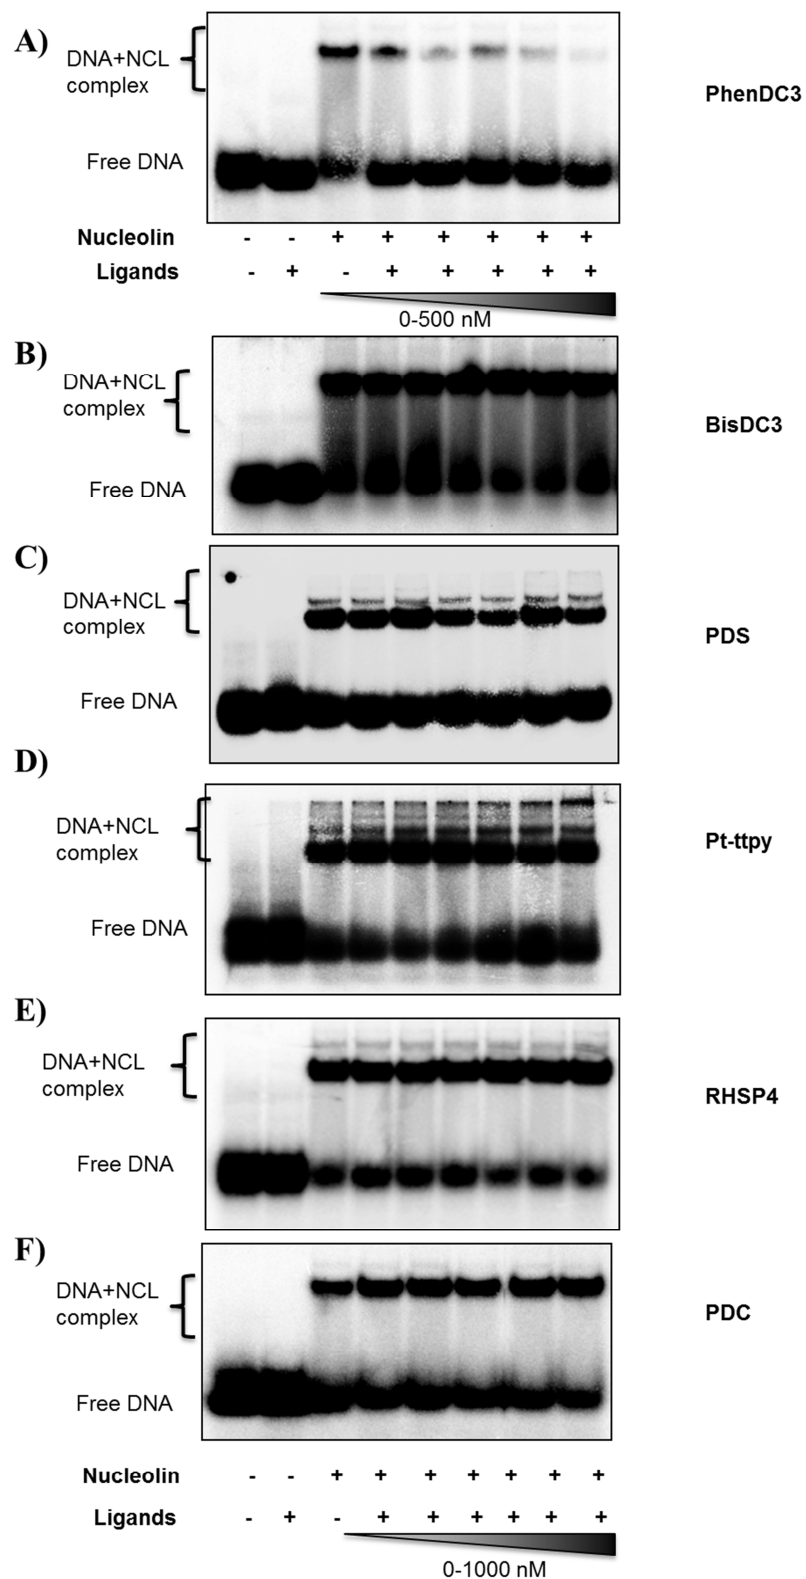

**Figure S8.** Displacement of NCL from CEB25-L191 followed by EMSA gel (10%) in the presence of a) PhenDC3 b) BisDC3 c) PDS d) Pt-ttpty e) RHSP4 f) 360A-PDC. [DNA]= 20 nM, [NCL] = 250 nM, [Ligand] = 0-500 nM (a); 0-1000 nM (b-f)

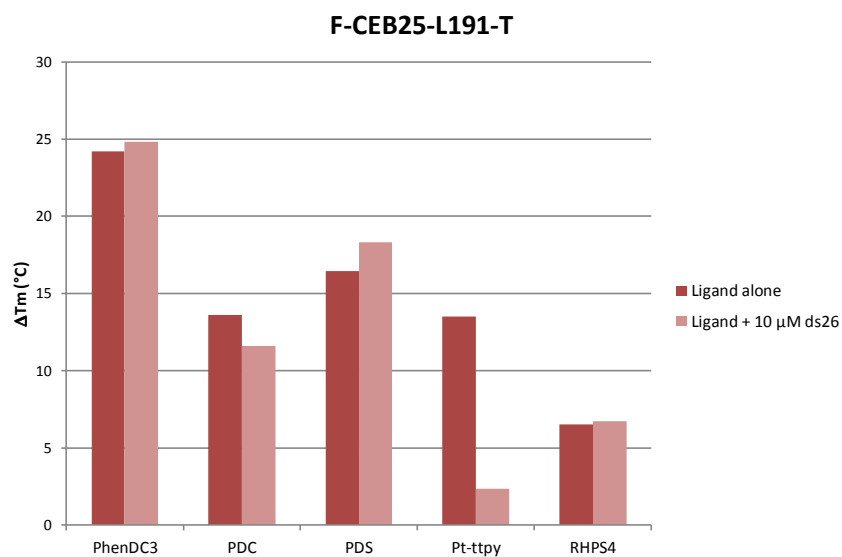

| Ligand  | $\Delta T_{1/2}$ (°C) (ligand alone) | $\Delta T_{1/2}$ (°C) (+ ds 26) |
|---------|--------------------------------------|---------------------------------|
| PhenDC3 | 24.6                                 | 24.8                            |
| PDC     | 13.6                                 | 11.6                            |
| PDS     | 16.4                                 | 18.3                            |
| Pt-ttpy | 13.5                                 | 2.3                             |
| RHPS4*  | 6.6                                  | 6.7                             |

**Figure S9:** Stabilisation of G4-CEB25-191 by ligands measured by FRET-melting ( $\Delta T_{1/2}$  / °C) using doubly labelled F-CEB25-191-T. [oligonucleotide] = 0.2 $\mu$ M, [ligand]= 1 $\mu$ M, without (red) and with (pink) duplex competitor [ds26] = 10 $\mu$ M. All ligands are selective ( $\Delta T_{1/2}$  is poorly affected by the duplex competitor) at the exception of Pt-ttpy. \*The values determined for RHPS4 are given as indication but could be biased as the fluorescence of this ligand interferes with the FRET signal.

**Table S1:** Thermal stability of the CEB25 variants measured by UV-melting in 1mM K<sup>+</sup> buffer (Li Cacodylate 10 mM, LiCl 99 mM, KCl 1 mM). Thermal stability is expected to be even higher in our conditions (100mM K<sup>+</sup>). Data taken from ref 9 (EMBO J., 2015, 34 1718) and Nucleic Acid Research 2006,34, 5133 (BCL2-mid).

| <b>G4 name</b> | <b>T<sub>m</sub> °C</b> |
|----------------|-------------------------|
| CEB25-L191     | 55.1                    |
| CEB25-L151     | 59.7                    |
| CEB25-L131     | 61.9                    |
| CEB25-L121     | 67.9                    |
| CEB25-L111     | 73.4                    |
| BCL2-mid       | 66.0                    |

**Table S2.** List of peptides identified following the workflow of Fig S5 with corresponding UV+/UV- ratios of extracted areas and p values. The 15- aa-peptide on the top (line 1) is the only one to be significantly depleted (ratio <0.5, p values < 0.05). Of note the resulting tryptic peptides (8-aa fragment GIAYIEFK, line 18) and (SKGIAYIEFK, line 7, miscleaved) show no significant variation in ratio. However, the second TEADAEK 7-aa fragment has never been detected in the control and in the UV irradiated conditions indicating that this part might be tightly protected by the protein and could thus be the preferred crosslinking site.

| Peptide                     | Precursor Mz | RT     | Begin Pos | End Pos | +UV / -UV   | P-value     |
|-----------------------------|--------------|--------|-----------|---------|-------------|-------------|
| GIAYIEFKTEADAEK             | 563.285798   | 42.32  | 251       | 265     | 0.45492881  | 0.008188063 |
| EAMEDGEIDGNKVTLDWAKPK       | 588.287508   | 48.17  | 449       | 469     | 0.474168303 | 0.06090465  |
| GFGFVDFNSEEDAKAAK           | 612.288091   | 51.33  | 432       | 448     | 1.688455459 | 0.114163818 |
| ALELTGLKVFNGEIK             | 545.650412   | 69.01  | 184       | 198     | 0.69581864  | 0.16409645  |
| VTLDWAKPK                   | 530.305666   | 26.28  | 461       | 469     | 0.686531433 | 0.165291277 |
| GFGFVDFNSEEDAK              | 782.343903   | 66.42  | 432       | 445     | 0.773293039 | 0.201777732 |
| SKGIAYIEFK                  | 579.324056   | 31.77  | 249       | 258     | 1.581714147 | 0.234953752 |
| ETGSSKGFVDFNSEEDAK          | 718.655279   | 49.7   | 426       | 445     | 1.621130712 | 0.391724244 |
| SISLYYTGEKGQNQDYR           | 1012.481793  | 30.34  | 279       | 295     | 0.780469869 | 0.522825416 |
| SAPELKTGISDVFAK             | 522.619001   | 46.14  | 140       | 154     | 1.135953077 | 0.547015549 |
| ALELTGLK                    | 423.76056    | 36.9   | 184       | 191     | 1.116380638 | 0.584138579 |
| GYAFIEFASFEDAK              | 798.874839   | 86.88  | 345       | 358     | 1.13774566  | 0.598987053 |
| IVTDRETGSSKGFVDFNSEEDAK     | 913.431349   | 46.68  | 421       | 445     | 0.867698327 | 0.601222436 |
| KFGYVDFESAEDLEK             | 593.949075   | 56.36  | 169       | 183     | 1.176903508 | 0.636493219 |
| AIRLELQGPR                  | 577.846021   | 28.09  | 373       | 382     | 0.845054772 | 0.63995955  |
| VTLDWAKPKGEGGFGR            | 445.48633    | 32.87  | 461       | 477     | 1.288923708 | 0.663272678 |
| TGISDVFAKNDLAVVDVR          | 641.34594    | 72.96  | 146       | 163     | 0.717791443 | 0.699798221 |
| GIAYIEFK                    | 471.76056    | 48.58  | 251       | 258     | 0.93572101  | 0.721750201 |
| FGYVDFESAEDLEK              | 825.872493   | 71.86  | 170       | 183     | 0.934034301 | 0.737398345 |
| VEGTEPTTAFNLFVGNLNFNKSAPELK | 736.130273   | 93.6   | 119       | 145     | 1.108359159 | 0.744128083 |
| VTQDELKEVFEDAAEIR           | 997.499651   | 78.47  | 225       | 241     | 1.090472103 | 0.789647877 |
| VSDGSSEIFFK                 | 609.298235   | 44.4   | 35        | 45      | 1.025025084 | 0.876253049 |
| NLPYKVTQDELKEVFEDAAEIR      | 653.587975   | 85.02  | 220       | 241     | 1.051834361 | 0.877705999 |
| EVFEDAAEIR                  | 590.788035   | 39.28  | 232       | 241     | 1.022458879 | 0.891477809 |
| GLSEDTEETLKESFDGSR          | 735.013243   | 52.21  | 399       | 418     | 1.028120215 | 0.892488445 |
| TGISDVFAK                   | 470.2531     | 40.45  | 146       | 154     | 1.01785008  | 0.919304582 |
| SKGYAFIEFASFEDAK            | 604.961315   | 67.85  | 343       | 358     | 0.965470774 | 0.956801899 |
| VEGTEPTTAFNLFVGNLNFNKS      | 772.390097   | 102.69 | 119       | 139     | 1.010858945 | 0.959180766 |
| SISLYYTGEK                  | 581.795329   | 36.15  | 279       | 288     | 1.008079381 | 0.966120408 |
|                             |              |        |           |         |             |             |
|                             |              |        |           |         |             |             |
